# Supplementary material
Source: PubMed Central journal article supplement (PMC6032576)
Supplement: CJN.11121017SupplementaryData.pdf [file CJN.11121017SupplementaryData.pdf]

## **Supplemental Materials**

Supplemental Figure 1. Cumulative incidence of all-cause mortality according to annually-updated tobacco smoking, alcohol drinking, marijuana use, and hard illicit drug use

Supplemental Table 1. Characteristics of 3939 patients with CKD according to CKD progression and all-cause mortality (the CRIC Study)

Supplemental Table 2. Number of events, incidence, and hazard ratios and 95% confidence intervals of CKD progression and all-cause mortality associated with baseline tobacco smoking, alcohol drinking, marijuana use, and hard illicit drug use among 3939 patients with CKD

Supplemental Table 3. Hazard ratios and 95% confidence intervals of CKD progression and all-cause mortality associated with annually-updated tobacco smoking, alcohol drinking, marijuana use, and hard illicit drug use among 3939 patients with CKD

Supplemental Table 4. Hazard ratios and 95% confidence intervals of all-cause mortality associated with cumulative average tobacco smoking, alcohol drinking, marijuana use, and hard illicit drug use by subgroups

Supplemental Table 5. Hazard ratios and 95% confidence intervals of CKD progression or all-cause mortality associated with cumulative average tobacco smoking, alcohol drinking, marijuana use, and hard illicit drug use by subgroups

**Supplemental Figure 1. Cumulative incidence of all-cause mortality according to annually-updated tobacco smoking, alcohol drinking, marijuana use, and hard illicit drug use**

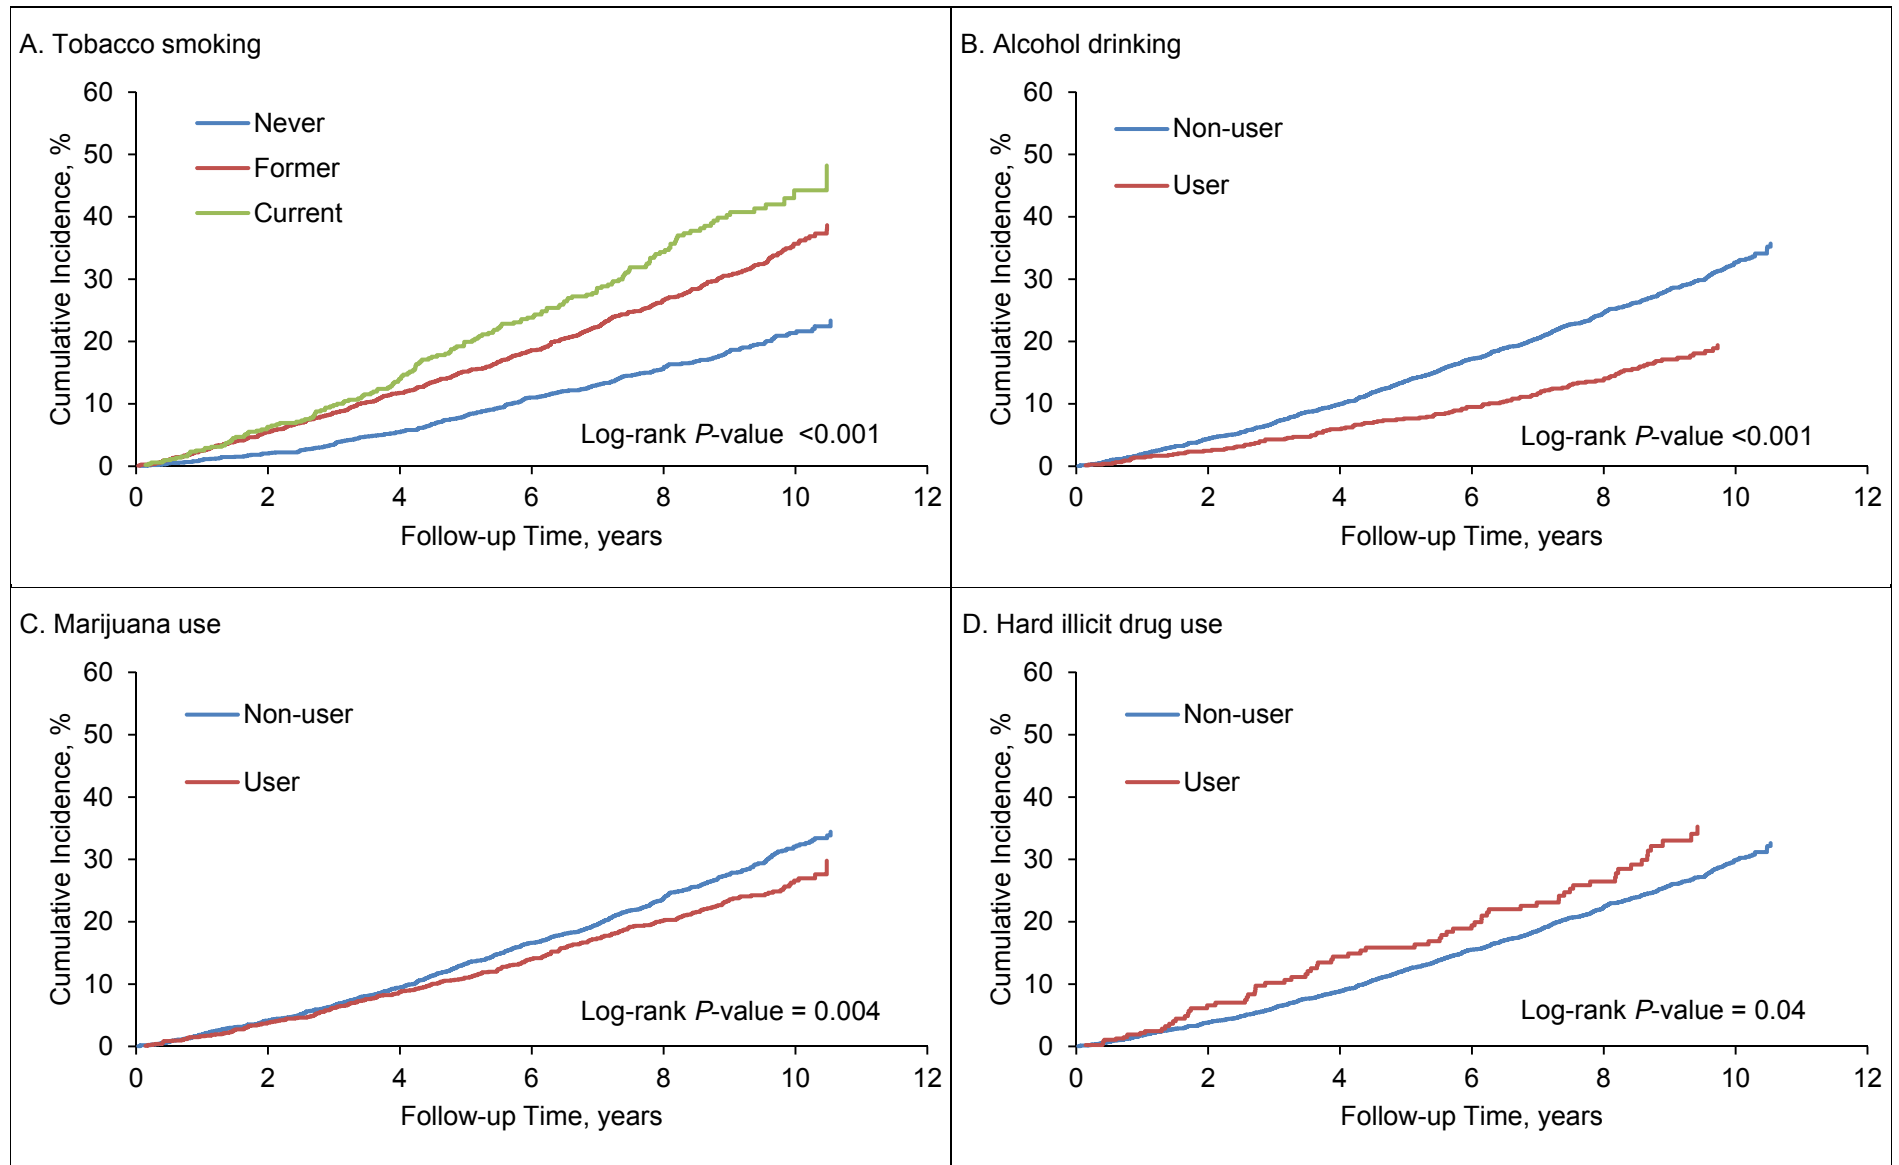

*Supplemental material is neither peer-reviewed nor thoroughly edited by CJASN. The authors alone are responsible for the accuracy and presentation of the material.*

Panel A Cumulative incidence of all-cause mortality among never, former, and current tobacco smokers. Panel B Cumulative incidence of all-cause mortality for alcohol drinkers and non-drinkers. Panel C Cumulative incidence of all-cause mortality among marijuana users and non-users. Panel D Cumulative incidence of all-cause mortality among hard illicit drug users and non-users. CKD, chronic kidney disease

**Supplemental Table 1. Characteristics of 3939 patients with CKD according to CKD progression and all-cause mortality (the CRIC Study)**

| Variable                                      | CKD progression            |                         | All-cause Mortality  |                   |
|-----------------------------------------------|----------------------------|-------------------------|----------------------|-------------------|
|                                               | No Progression<br>(n=2652) | Progression<br>(n=1287) | No Death<br>(n=2938) | Death<br>(n=1001) |
| Age, mean ± SD, years                         | 59 ± 11                    | 56 ± 12                 | 56 ± 11              | 62 ± 9            |
| Female, no. (%)                               | 1243 (47)                  | 535 (42)                | 1398 (48)            | 380 (38)          |
| Race/ethnicity, no. (%)                       |                            |                         |                      |                   |
| Non-Hispanic white                            | 1279 (48)                  | 359 (28)                | 1270 (43)            | 368 (37)          |
| Non-Hispanic black                            | 1019 (38)                  | 631 (49)                | 1167 (40)            | 483 (48)          |
| Hispanic                                      | 253 (10)                   | 244 (19)                | 376 (13)             | 121 (12)          |
| Other                                         | 101 (4)                    | 53 (4)                  | 125 (4)              | 29 (3)            |
| High school graduate, no. (%)                 | 2175 (82)                  | 935 (73)                | 2396 (82)            | 714 (71)          |
| Physical activity, mean ± SD, METs/wk         | 200 (140)                  | 194 (156)               | 209 (149)            | 167 (131)         |
| Former tobacco smoking, no. (%)               | 1117 (48)                  | 524 (48)                | 1155 (44)            | 486 (60)          |
| Current tobacco smoking, no. (%)              | 316 (21)                   | 201 (26)                | 320 (18)             | 197 (38)          |
| Alcohol drinking, no. (%) <sup>a</sup>        | 600 (23)                   | 193 (15)                | 635 (22)             | 158 (16)          |
| Marijuana use, no. (%) <sup>b</sup>           | 882 (33)                   | 411 (32)                | 1001 (34)            | 292 (29)          |
| Hard illicit drug use, no. (%) <sup>b,c</sup> | 324 (12)                   | 150 (12)                | 356 (12)             | 118 (12)          |
| Body mass index, mean ± SD, kg/m <sup>2</sup> | 32 ± 8                     | 32 ± 8                  | 32 ± 8               | 32 ± 8            |
| History of CVD, no. (%)                       | 821 (31)                   | 495 (39)                | 756 (26)             | 560 (56)          |
| Hypertension, no. (%)                         | 2195 (83)                  | 1196 (93)               | 2459 (84)            | 932 (93)          |
| Diabetes, no. (%)                             | 1076 (41)                  | 832 (65)                | 1270 (43)            | 638 (64)          |
| Antihypertensive medication, no. (%)          | 2363 (90)                  | 1229 (96)               | 2621 (90)            | 971 (98)          |

Supplemental material is neither peer-reviewed nor thoroughly edited by CJASN. The authors alone are responsible for the accuracy and presentation of the material.

|                                                 |                |                |                |                |
|-------------------------------------------------|----------------|----------------|----------------|----------------|
| NSAIDs, no. (%)                                 | 1416 (54)      | 598 (47)       | 1466 (50)      | 548 (55)       |
| Systolic BP, mean $\pm$ SD, mm Hg               | 124 $\pm$ 21   | 137 $\pm$ 23   | 127 $\pm$ 21   | 134 $\pm$ 24   |
| Diastolic BP, mean $\pm$ SD, mm Hg              | 70 $\pm$ 12    | 74 $\pm$ 13    | 72 $\pm$ 13    | 71 $\pm$ 14    |
| LDL cholesterol, mean $\pm$ SD, mg/dL           | 102 $\pm$ 34   | 103 $\pm$ 39   | 104 $\pm$ 35   | 100 $\pm$ 37   |
| HDL cholesterol, mean $\pm$ SD, mg/dL           | 48 $\pm$ 16    | 46 $\pm$ 15    | 48 $\pm$ 15    | 46 $\pm$ 16    |
| Hemoglobin, mean $\pm$ SD, g/dL                 | 12.9 (1.7)     | 12.0 (1.8)     | 12.7 (1.8)     | 12.2 (1.8)     |
| eGFR, mean $\pm$ SD, ml/min/1.73 m <sup>2</sup> | 49 $\pm$ 17    | 36 $\pm$ 13    | 48 $\pm$ 17    | 37 $\pm$ 13    |
| Urinary protein, median (IQR), g/24 h           | 0.1 (0.1, 0.3) | 1.2 (0.4, 3.1) | 0.2 (0.1, 0.7) | 0.4 (0.1, 1.8) |

BP, blood pressure; CKD, chronic kidney disease; eGFR, estimated glomerular filtration rate; HDL, high-density lipoprotein; IQR, interquartile range; LDL, low-density lipoprotein; NSAIDs, non-steroidal anti-inflammatory drugs; SD, standard deviation

<sup>a</sup> Participants were classified as users of alcohol if they reported having one or more alcoholic drinks per week

<sup>b</sup> Participants were classified as users of marijuana and hard illicit drugs if they reported any lifetime history of use

<sup>c</sup> Hard illicit drug use is defined as self-reported use of cocaine, heroin, or methamphetamine

**Supplemental Table 2. Number of events, incidence, and hazard ratios of CKD progression and all-cause mortality according to baseline tobacco smoking, alcohol drinking, marijuana use, and illicit drug use among 3939 patients with CKD**

| Variable                   | Number of events,<br>user vs. non-user | Incidence per<br>1000 PYs,<br>user vs. non-user | Univariable      |         | Age, sex, race/ethnicity,<br>and clinical site adjusted |         | Multivariable adjusted |         |
|----------------------------|----------------------------------------|-------------------------------------------------|------------------|---------|---------------------------------------------------------|---------|------------------------|---------|
|                            |                                        |                                                 | HR (95% CI)      | P Value | HR (95% CI)                                             | P Value | HR (95% CI)            | P Value |
| <b>CKD progression</b>     |                                        |                                                 |                  |         |                                                         |         |                        |         |
| Former tobacco smoking     | 524 vs. 562                            | 60.2 vs. 55.9                                   | 1.08 (0.96-1.22) | 0.21    | 1.17 (1.03-1.32)                                        | 0.01    | 1.00 (0.88-1.14)       | 0.95    |
| Current tobacco smoking    | 201 vs. 562                            | 86.9 vs. 55.9                                   | 1.57 (1.33-1.84) | <0.001  | 1.36 (1.15-1.61)                                        | <0.001  | 1.15 (0.97-1.37)       | 0.12    |
| Alcohol drinking           | 193 vs. 1094                           | 41.0 vs. 66.8                                   | 0.61 (0.52-0.71) | <0.001  | 0.75 (0.64-0.88)                                        | <0.001  | 0.99 (0.84-1.17)       | 0.91    |
| Marijuana use              | 411 vs. 876                            | 58.1 vs. 62.5                                   | 0.93 (0.83-1.05) | 0.23    | 0.92 (0.81-1.04)                                        | 0.17    | 0.90 (0.79-1.03)       | 0.12    |
| Hard illicit drug use      | 150 vs. 1137                           | 59.9 vs. 61.2                                   | 0.98 (0.83-1.16) | 0.82    | 0.91 (0.77-1.09)                                        | 0.30    | 0.94 (0.79-1.13)       | 0.54    |
| Cocaine use                | 129 vs. 1158                           | 56.3 vs. 61.6                                   | 0.91 (0.76-1.10) | 0.33    | 0.82 (0.68-0.99)                                        | 0.04    | 0.85 (0.70-1.03)       | 0.09    |
| Heroin use                 | 28 vs. 1259                            | 136.6 vs. 60.3                                  | 2.32 (1.60-3.38) | <0.001  | 1.69 (1.16-2.46)                                        | 0.007   | 1.47 (0.99-2.19)       | 0.06    |
| Methamphetamine use        | 47 vs. 1240                            | 63.2 vs. 61.0                                   | 1.04 (0.78-1.39) | 0.81    | 1.27 (0.94-1.70)                                        | 0.12    | 1.22 (0.90-1.65)       | 0.20    |
| <b>All-cause mortality</b> |                                        |                                                 |                  |         |                                                         |         |                        |         |
| Former tobacco smoking     | 486 vs. 318                            | 39.3 vs. 22.2                                   | 1.80 (1.56-2.07) | <0.001  | 1.46 (1.27-1.69)                                        | <0.001  | 1.38 (1.18-1.60)       | <0.001  |
| Current tobacco smoking    | 197 vs. 318                            | 53.7 vs. 22.2                                   | 2.49 (2.08-2.97) | <0.001  | 2.32 (1.93-2.79)                                        | <0.001  | 2.09 (1.72-2.55)       | <0.001  |
| Alcohol drinking           | 158 vs. 843                            | 24.9 vs. 35.1                                   | 0.70 (0.59-0.83) | <0.001  | 0.78 (0.65-0.93)                                        | 0.005   | 0.91 (0.76-1.10)       | 0.34    |
| Marijuana use              | 292 vs. 709                            | 28.8 vs. 35.1                                   | 0.81 (0.71-0.93) | 0.003   | 1.10 (0.95-1.27)                                        | 0.21    | 1.06 (0.91-1.24)       | 0.45    |
| Hard illicit drug use      | 118 vs. 883                            | 32.7 vs. 33.0                                   | 0.99 (0.82-1.20) | 0.94    | 1.35 (1.11-1.66)                                        | 0.003   | 1.24 (1.00-1.53)       | 0.049   |
| Cocaine use                | 99 vs. 902                             | 30.2 vs. 33.3                                   | 0.91 (0.74-1.12) | 0.36    | 1.26 (1.02-1.57)                                        | 0.04    | 1.24 (0.98-1.56)       | 0.07    |
| Heroin use                 | 25 vs. 976                             | 68.6 vs. 32.5                                   | 2.18 (1.47-3.24) | <0.001  | 2.08 (1.39-3.12)                                        | <0.001  | 1.40 (0.91-2.16)       | 0.12    |

Supplemental material is neither peer-reviewed nor thoroughly edited by CJASN. The authors alone are responsible for the accuracy and presentation of the material.

|                                               |              |                |                  |        |                  |        |                  |        |
|-----------------------------------------------|--------------|----------------|------------------|--------|------------------|--------|------------------|--------|
| Methamphetamine use                           | 36 vs. 965   | 32.5 vs. 33.0  | 0.99 (0.71-1.38) | 0.94   | 1.36 (0.97-1.90) | 0.08   | 1.20 (0.85-1.69) | 0.31   |
| <b>CKD progression or all-cause mortality</b> |              |                |                  |        |                  |        |                  |        |
| Former tobacco smoking                        | 804 vs. 748  | 88.1 vs. 72.3  | 1.22 (1.11-1.35) | <0.001 | 1.22 (1.10-1.35) | <0.001 | 1.09 (0.98-1.22) | 0.10   |
| Current tobacco smoking                       | 304 vs. 804  | 124.6 vs. 72.3 | 1.76 (1.54-2.01) | <0.001 | 1.56 (1.36-1.79) | <0.001 | 1.33 (1.15-1.54) | <0.001 |
| Alcohol drinking                              | 296 vs. 1560 | 61.1 vs. 91.4  | 0.66 (0.59-0.75) | <0.001 | 0.79 (0.70-0.90) | <0.001 | 1.02 (0.89-1.17) | 0.79   |
| Marijuana use                                 | 573 vs. 1283 | 78.4 vs. 87.8  | 0.89 (0.81-0.98) | 0.02   | 0.94 (0.85-1.05) | 0.28   | 0.92 (0.82-1.03) | 0.14   |
| Hard illicit drug use                         | 213 vs. 1643 | 82.2 vs. 85.0  | 0.97 (0.84-1.12) | 0.67   | 0.99 (0.85-1.14) | 0.85   | 0.96 (0.82-1.12) | 0.58   |
| Cocaine use                                   | 183 vs. 1673 | 77.2 vs. 85.6  | 0.90 (0.77-1.05) | 0.18   | 0.89 (0.76-1.05) | 0.17   | 0.87 (0.74-1.03) | 0.11   |
| Heroin use                                    | 36 vs. 1820  | 166.3 vs. 83.9 | 2.05 (1.48-2.86) | <0.001 | 1.63 (1.17-2.27) | 0.004  | 1.23 (0.86-1.76) | 0.25   |
| Methamphetamine use                           | 66 vs. 1790  | 86.1 vs. 84.6  | 1.02 (0.80-1.30) | 0.88   | 1.26 (0.99-1.62) | 0.06   | 1.22 (0.95-1.57) | 0.13   |

Hazard ratios compare former and current tobacco smoking with never smoking, alcohol drinking with non-drinking, marijuana use with no marijuana use, and hard illicit drug use (use of cocaine, heroin, or methamphetamine) with no hard illicit drug use. Multivariable-adjusted: adjusted for age, sex, race/ethnicity, clinical site, education, estimated glomerular filtration rate, proteinuria, history of diabetes, body mass index, systolic blood pressure, hemoglobin, use of non-steroidal anti-inflammatory drugs; current tobacco smoking was additionally adjusted in models of weekly alcohol drinking, marijuana use, and hard illicit drug use. CI, confidence interval; CKD, chronic kidney disease; HR, hazard ratio.

**Supplemental Table 3. Hazard ratios and 95% confidence intervals of CKD progression and all-cause mortality associated with annually-updated tobacco smoking, alcohol drinking, marijuana use, and hard illicit drug use among 3939 patients with CKD**

| Variable                   | Univariable      |         | Age, sex, race/ethnicity, and clinical site adjusted |         | Multivariable adjusted |         |
|----------------------------|------------------|---------|------------------------------------------------------|---------|------------------------|---------|
|                            | HR (95% CI)      | P Value | HR (95% CI)                                          | P Value | HR (95% CI)            | P Value |
| <b>CKD progression</b>     |                  |         |                                                      |         |                        |         |
| Former tobacco smoking     | 1.11 (0.99-1.25) | 0.08    | 1.20 (1.06-1.36)                                     | 0.003   | 1.05 (0.93-1.20)       | 0.41    |
| Current tobacco smoking    | 1.49 (1.26-1.76) | <0.001  | 1.29 (1.08-1.53)                                     | 0.004   | 1.02 (0.86-1.23)       | 0.79    |
| Alcohol drinking           | 0.51 (0.44-0.61) | <0.001  | 0.63 (0.53-0.75)                                     | <0.001  | 1.03 (0.86-1.22)       | 0.76    |
| Marijuana use              | 0.93 (0.83-1.05) | 0.24    | 0.92 (0.81-1.04)                                     | 0.18    | 0.94 (0.83-1.07)       | 0.36    |
| Hard illicit drug use      | 1.32 (1.07-1.63) | 0.01    | 1.34 (1.08-1.65)                                     | 0.008   | 1.30 (1.04-1.62)       | 0.02    |
| Cocaine use                | 1.29 (0.91-1.83) | 0.15    | 1.15 (0.81-1.63)                                     | 0.44    | 1.43 (0.99-2.07)       | 0.06    |
| Heroin use                 | 2.45 (1.71-3.49) | <0.001  | 1.79 (1.25-2.56)                                     | 0.002   | 1.59 (1.10-2.31)       | 0.01    |
| Methamphetamine use        | 1.06 (0.80-1.41) | 0.68    | 1.28 (0.96-1.70)                                     | 0.10    | 1.12 (0.83-1.50)       | 0.47    |
| <b>All-cause mortality</b> |                  |         |                                                      |         |                        |         |
| Former tobacco smoking     | 1.82 (1.59-2.10) | <0.001  | 1.50 (1.30-1.73)                                     | <0.001  | 1.41 (1.21-1.63)       | <0.001  |
| Current tobacco smoking    | 2.48 (2.05-2.98) | <0.001  | 2.31 (1.91-2.80)                                     | <0.001  | 2.15 (1.76-2.64)       | <0.001  |
| Alcohol drinking           | 0.56 (0.46-0.67) | <0.001  | 0.64 (0.53-0.78)                                     | <0.001  | 0.79 (0.64-0.96)       | 0.02    |



Supplemental material is neither peer-reviewed nor thoroughly edited by CJASN. The authors alone are responsible for the accuracy and presentation of the material.

|                                               |                  |        |                  |        |                  |       |
|-----------------------------------------------|------------------|--------|------------------|--------|------------------|-------|
| Marijuana use                                 | 0.81 (0.71-0.93) | 0.003  | 1.11 (0.96-1.28) | 0.16   | 1.12 (0.96-1.30) | 0.15  |
| Hard illicit drug use                         | 1.30 (1.03-1.65) | 0.03   | 1.64 (1.29-2.09) | <0.001 | 1.35 (1.05-1.73) | 0.02  |
| Cocaine use                                   | 1.43 (0.97-2.09) | 0.07   | 1.90 (1.29-2.81) | 0.001  | 1.76 (1.17-2.66) | 0.007 |
| Heroin use                                    | 2.23 (1.52-3.27) | <0.001 | 2.11 (1.43-3.12) | <0.001 | 1.45 (0.97-2.15) | 0.07  |
| Methamphetamine use                           | 1.05 (0.76-1.45) | 0.76   | 1.43 (1.03-1.97) | 0.03   | 1.26 (0.91-1.75) | 0.17  |
| <b>CKD progression or all-cause mortality</b> |                  |        |                  |        |                  |       |
| Former tobacco smoking                        | 1.25 (1.13-1.38) | <0.001 | 1.24 (1.12-1.38) | <0.001 | 1.11 (1.00-1.24) | 0.048 |
| Current tobacco smoking                       | 1.69 (1.47-1.94) | <0.001 | 1.49 (1.29-1.72) | <0.001 | 1.19 (1.03-1.39) | 0.02  |
| Alcohol drinking                              | 0.56 (0.49-0.64) | <0.001 | 0.67 (0.59-0.77) | <0.001 | 0.98 (0.85-1.13) | 0.78  |
| Marijuana use                                 | 0.89 (0.81-0.98) | 0.02   | 0.94 (0.85-1.05) | 0.29   | 0.97 (0.87-1.08) | 0.58  |
| Hard illicit drug use                         | 1.30 (1.09-1.55) | 0.003  | 1.38 (1.15-1.65) | <0.001 | 1.28 (1.07-1.54) | 0.008 |
| Cocaine use                                   | 1.40 (1.07-1.84) | 0.02   | 1.35 (1.02-1.77) | 0.03   | 1.47 (1.10-1.97) | 0.009 |
| Heroin use                                    | 2.17 (1.59-2.97) | <0.001 | 1.72 (1.26-2.37) | 0.001  | 1.40 (1.02-1.94) | 0.04  |
| Methamphetamine use                           | 1.05 (0.82-1.33) | 0.71   | 1.28 (1.00-1.63) | 0.05   | 1.16 (0.90-1.48) | 0.25  |

Hazard ratios compare former and current tobacco smoking with never smoking, alcohol drinking with non-drinking, marijuana use with no marijuana use, and hard illicit drug use (use of cocaine, heroin, or methamphetamine) with no hard illicit drug use. Multivariable-adjusted: adjusted for age, sex, race/ethnicity, clinical site, education, estimated glomerular filtration rate, proteinuria, history of diabetes, body mass index, systolic blood pressure, hemoglobin, use of non-steroidal anti-inflammatory drugs; current tobacco smoking was additionally adjusted in models of weekly alcohol drinking, marijuana use, and hard illicit drug use. CI, confidence interval; CKD, chronic kidney disease; HR, hazard ratio.

**Supplemental Table 4. Hazard ratios and 95% confidence intervals of all-cause mortality associated with cumulative average tobacco smoking, alcohol drinking, marijuana use, and hard illicit drug use by subgroups**

| Subgroups     | HR (95% CI)      | P Value | P Value for Interaction | HR (95% CI)      | P Value | P Value for Interaction |
|---------------|------------------|---------|-------------------------|------------------|---------|-------------------------|
|               | Tobacco Smoking  |         |                         | Alcohol Drinking |         |                         |
| Sex           |                  |         |                         |                  |         |                         |
| Men           | 1.96 (1.56-2.46) | <0.001  | 0.45                    | 0.74 (0.58-0.95) | 0.02    | 0.71                    |
| Women         | 1.70 (1.25-2.30) | 0.001   |                         | 0.67 (0.42-1.08) | 0.10    |                         |
| Race          |                  |         |                         |                  |         |                         |
| White         | 2.32 (1.70-3.18) | <0.001  | 0.15                    | 0.69 (0.51-0.92) | 0.01    | 0.53                    |
| Non-white     | 1.76 (1.41-2.19) | <0.001  |                         | 0.79 (0.56-1.11) | 0.18    |                         |
| Age           |                  |         |                         |                  |         |                         |
| Age <65 years | 1.97 (1.58-2.45) | <0.001  | 0.40                    | 0.69 (0.51-0.93) | 0.02    | 0.58                    |
| Age ≥65 years | 1.66 (1.18-2.33) | 0.004   |                         | 0.78 (0.56-1.08) | 0.13    |                         |
| Baseline eGFR |                  |         |                         |                  |         |                         |
| eGFR <45      | 1.68 (1.36-2.08) | <0.001  | 0.08                    | 0.66 (0.50-0.87) | 0.004   | 0.22                    |
| eGFR ≥45      | 2.45 (1.69-3.54) | <0.001  |                         | 0.87 (0.61-1.25) | 0.46    |                         |
| Marijuana Use |                  |         | Hard Illicit Drug Use   |                  |         |                         |
| Sex           |                  |         |                         |                  |         |                         |
| Men           | 1.06 (0.89-1.27) | 0.49    | 0.35                    | 1.29 (0.97-1.72) | 0.09    | 0.17                    |
| Women         | 1.23 (0.95-1.58) | 0.11    |                         | 1.88 (1.18-2.98) | 0.007   |                         |
| Race          |                  |         |                         |                  |         |                         |
| White         | 1.03 (0.81-1.31) | 0.83    | 0.32                    | 1.17 (0.77-1.78) | 0.45    | 0.23                    |
| Non-white     | 1.19 (0.99-1.43) | 0.06    |                         | 1.60 (1.19-2.17) | 0.002   |                         |

Supplemental material is neither peer-reviewed nor thoroughly edited by CJASN. The authors alone are responsible for the accuracy and presentation of the material.

|               |                  |      |      |                  |       |      |
|---------------|------------------|------|------|------------------|-------|------|
| Age           |                  |      |      |                  |       |      |
| Age <65 years | 1.20 (1.00-1.43) | 0.05 | 0.19 | 1.47 (1.12-1.92) | 0.006 | 0.66 |
| Age ≥65 years | 0.96 (0.73-1.27) | 0.79 |      | 1.26 (0.67-2.36) | 0.48  |      |
| Baseline eGFR |                  |      |      |                  |       |      |
| eGFR <45      | 1.09 (0.92-1.30) | 0.32 | 0.67 | 1.42 (1.07-1.88) | 0.01  | 0.93 |
| eGFR ≥45      | 1.17 (0.88-1.55) | 0.28 |      | 1.39 (0.84-2.29) | 0.20  |      |

Hazard ratios compare persistent tobacco smoking throughout follow-up with non-smoking, persistent alcohol drinking throughout follow-up with non-drinking, persistent marijuana use throughout follow-up with no marijuana use, and persistent hard illicit drug use (use of cocaine, heroin, or methamphetamine) throughout follow-up with no hard illicit drug use. Adjusted for age, sex, race/ethnicity, clinical site, education, estimated glomerular filtration rate, proteinuria, history of diabetes, body mass index, systolic blood pressure, hemoglobin, use of non-steroidal anti-inflammatory drugs; current tobacco smoking was additionally adjusted in models of weekly alcohol drinking, marijuana use, and hard illicit drug use. CI, confidence interval; CKD, chronic kidney disease; eGFR, estimated-glomerular filtration rate; HR, hazard ratio.

**Supplemental Table 5. Hazard ratios and 95% confidence intervals of CKD progression or all-cause mortality associated with cumulative average tobacco smoking, alcohol drinking, marijuana use, and hard illicit drug use by subgroups**

| Subgroups     | HR (95% CI)      | P Value | P Value for Interaction | HR (95% CI)      | P Value | P Value for Interaction |
|---------------|------------------|---------|-------------------------|------------------|---------|-------------------------|
|               | Tobacco Smoking  |         |                         | Alcohol Drinking |         |                         |
| Sex           |                  |         |                         |                  |         |                         |
| Men           | 1.25 (1.05-1.50) | 0.01    | 0.20                    | 1.01 (0.85-1.21) | 0.88    | 0.67                    |
| Women         | 1.05 (0.84-1.31) | 0.69    |                         | 0.94 (0.68-1.29) | 0.69    |                         |
| Race          |                  |         |                         |                  |         |                         |
| White         | 1.24 (0.96-1.61) | 0.10    | 0.65                    | 1.00 (0.80-1.24) | 0.99    | 0.93                    |
| Non-white     | 1.16 (0.99-1.36) | 0.08    |                         | 0.99 (0.79-1.23) | 0.90    |                         |
| Age           |                  |         |                         |                  |         |                         |
| Age <65 years | 1.19 (1.02-1.40) | 0.03    | 0.68                    | 1.00 (0.83-1.21) | 0.99    | 0.91                    |
| Age ≥65 years | 1.11 (0.82-1.51) | 0.50    |                         | 0.98 (0.75-1.29) | 0.90    |                         |
| Baseline eGFR |                  |         |                         |                  |         |                         |
| eGFR <45      | 1.10 (0.94-1.30) | 0.23    | 0.11                    | 1.01 (0.84-1.22) | 0.88    | 0.92                    |
| eGFR ≥45      | 1.43 (1.08-1.89) | 0.01    |                         | 1.00 (0.76-1.31) | 0.99    |                         |
| Marijuana Use |                  |         | Hard Illicit Drug Use   |                  |         |                         |
| Sex           |                  |         |                         |                  |         |                         |
| Men           | 0.95 (0.84-1.09) | 0.49    | 0.73                    | 1.34 (1.08-1.66) | 0.007   | 0.26                    |
| Women         | 0.99 (0.83-1.19) | 0.93    |                         | 1.06 (0.74-1.51) | 0.77    |                         |
| Race          |                  |         |                         |                  |         |                         |
| White         | 0.83 (0.69-0.99) | 0.04    | 0.03                    | 1.15 (0.84-1.57) | 0.39    | 0.45                    |
| Non-white     | 1.05 (0.93-1.20) | 0.43    |                         | 1.33 (1.06-1.66) | 0.01    |                         |

Supplemental material is neither peer-reviewed nor thoroughly edited by CJASN. The authors alone are responsible for the accuracy and presentation of the material.

|               |                  |      |      |                  |      |      |
|---------------|------------------|------|------|------------------|------|------|
| Age           |                  |      |      |                  |      |      |
| Age <65 years | 0.98 (0.86-1.11) | 0.73 | 0.81 | 1.27 (1.04-1.54) | 0.02 | 0.93 |
| Age ≥65 years | 0.95 (0.75-1.20) | 0.66 |      | 1.30 (0.74-2.29) | 0.36 |      |
| Baseline eGFR |                  |      |      |                  |      |      |
| eGFR <45      | 0.97 (0.85-1.10) | 0.62 | 0.99 | 1.23 (1.00-1.52) | 0.05 | 0.65 |
| eGFR ≥45      | 0.97 (0.79-1.19) | 0.77 |      | 1.36 (0.94-1.97) | 0.11 |      |

Hazard ratios compare persistent tobacco smoking throughout follow-up with non-smoking, persistent alcohol drinking throughout follow-up with non-drinking, persistent marijuana use throughout follow-up with no marijuana use, and persistent hard illicit drug use (use of cocaine, heroin, or methamphetamine) throughout follow-up with no hard illicit drug use. Adjusted for age, sex, race/ethnicity, clinical site, education, estimated glomerular filtration rate, proteinuria, history of diabetes, body mass index, systolic blood pressure, hemoglobin, use of non-steroidal anti-inflammatory drugs; current tobacco smoking was additionally adjusted in models of weekly alcohol drinking, marijuana use, and hard illicit drug use. CI, confidence interval; CKD, chronic kidney disease; eGFR, estimated-glomerular filtration rate; HR, hazard ratio.
